# Supplementary material for: Mining Amphibian and Insect Transcriptomes for Antimicrobial Peptide Sequences with rAMPage
Source: MDPI journal article supplement (doi:10.3390/antibiotics11070952), 2022-07-15
Supplement: s1 [file s1]

## Mining amphibian and insect transcriptomes for antimicrobial peptide sequences with rAMPage

Diana Lin <sup>1</sup>, Darcy Sutherland <sup>1,2,3</sup>, Sambina Islam Aninta <sup>1</sup>, Nathan Louie <sup>1</sup>, Ka Ming Nip <sup>1,4</sup>, Chenkai Li <sup>1,4</sup>, Anat Yanai <sup>1</sup>, Lauren Coombe <sup>1</sup>, René L. Warren <sup>1</sup>, Caren C. Helbing <sup>5</sup>, Linda M. N. Hoang <sup>2,3</sup> and Inanc Birol <sup>1,2,3,\*</sup>

<sup>1</sup> Canada's Michael Smith Genome Sciences Centre at BC Cancer, Vancouver, BC V5Z 4S6, Canada; dlin@bcgsc.ca (D.L.); dsutherland@bcgsc.ca (D.S.); saninta@bcgsc.ca (S.I.A.); nlouie@bcgsc.ca (N.L.); kmnip@bcgsc.ca (K.M.N.); cli@bcgsc.ca (C.L.); ayanai@bcgsc.ca (A.Y.); lcoombe@bcgsc.ca (L.C.); rwarren@bcgsc.ca (R.L.W.)

<sup>2</sup> British Columbia Centre for Disease Control, Public Health Laboratory, Vancouver, BC V6Z R4R, Canada; linda.hoang@bccdc.ca

<sup>3</sup> Department of Pathology and Laboratory Medicine, University of British Columbia, Vancouver, BC V6T 1Z4, Canada

<sup>4</sup> Bioinformatics Graduate Program, University of British Columbia, Vancouver, BC V6T 1Z4, Canada

<sup>5</sup> Department of Biochemistry and Microbiology, University of Victoria, Victoria, BC V8P 5C2, Canada; chelbing@uvic.ca

\* Correspondence: ibirol@bcgsc.ca

## Supplementary Figures

|                                                                                             |    |
|---------------------------------------------------------------------------------------------|----|
| FIGURE S1. RUNTIME AND MEMORY OF EACH DATASET THROUGH RAMPAGE .....                         | 3  |
| FIGURE S2. PUTATIVE AMP FILTERS USED FOR AMPHIBIANS AND INSECTS .....                       | 4  |
| FIGURE S3. SCORE, LENGTH, AND CHARGE DISTRIBUTION OF FILTERED PUTATIVE AMPS.....            | 5  |
| FIGURE S4. AMINO ACID COMPOSITION OF FILTERED PUTATIVE AMPS.....                            | 6  |
| FIGURE S5. ANTIMICROBIAL SUSCEPTIBILITY AND HEMOLYSIS TESTING OF 21 PUTATIVE AMPS .....     | 7  |
| FIGURE S6. MULTIPLE SEQUENCE ALIGNMENTS OF MODERATELY TO HIGHLY ACTIVE AMPS.....            | 8  |
| FIGURE S7. MULTIPLE SEQUENCE ALIGNMENTS OF MODERATELY TO HIGHLY ACTIVE AMP PRECURSORS.....  | 9  |
| FIGURE S8. DISTRIBUTION OF ALIGNMENT OF FILTERED PUTATIVE AMPS TO MATURE REFERENCE AMPS.... | 11 |
| FIGURE S9. DISTRIBUTION OF REFERENCE MATURE AMPS .....                                      | 12 |
| FIGURE S10. APPROACH FOR PEPTIDES WITH MULTIPLE CLEAVAGE SITES .....                        | 13 |

## Supplementary Tables

|                                                                                                                  |    |
|------------------------------------------------------------------------------------------------------------------|----|
| TABLE S1. PEPTIDE NAMING CONVENTION .....                                                                        | 14 |
| TABLE S2. SUBSET OF 21 PUTATIVE AMPS SYNTHESIZED AND VALIDATED AGAINST <i>E. COLI</i> AND <i>S. AUREUS</i> ..... | 15 |
| TABLE S3. ANNOTATION OF MODERATELY TO HIGHLY ACTIVE PUTATIVE MATURE AMPS.....                                    | 17 |
| TABLE S4. MAJOR OPTIONS FOR RAMPAGE .....                                                                        | 19 |
| TABLE S5. SENSITIVITY OF ALL PUTATIVE AMP FILTER COMBINATIONS .....                                              | 20 |
| TABLE S6. AMPHIBIAN RNA-SEQ DATASETS .....                                                                       | 21 |
| TABLE S7. INSECT RNA-SEQ DATASETS .....                                                                          | 25 |
| TABLE S8. BREAKDOWN OF AMP SEQUENCES IN AMP DATABASES .....                                                      | 28 |
| TABLE S9. SHELL SCRIPTING DEPENDENCIES OF RAMPAGE .....                                                          | 29 |
| TABLE S10. BIOINFORMATIC TOOL DEPENDENCIES OF RAMPAGE .....                                                      | 30 |
| TABLE S11. COMMAND AND PARAMETERS FOR EACH STEP OF RAMPAGE .....                                                 | 31 |

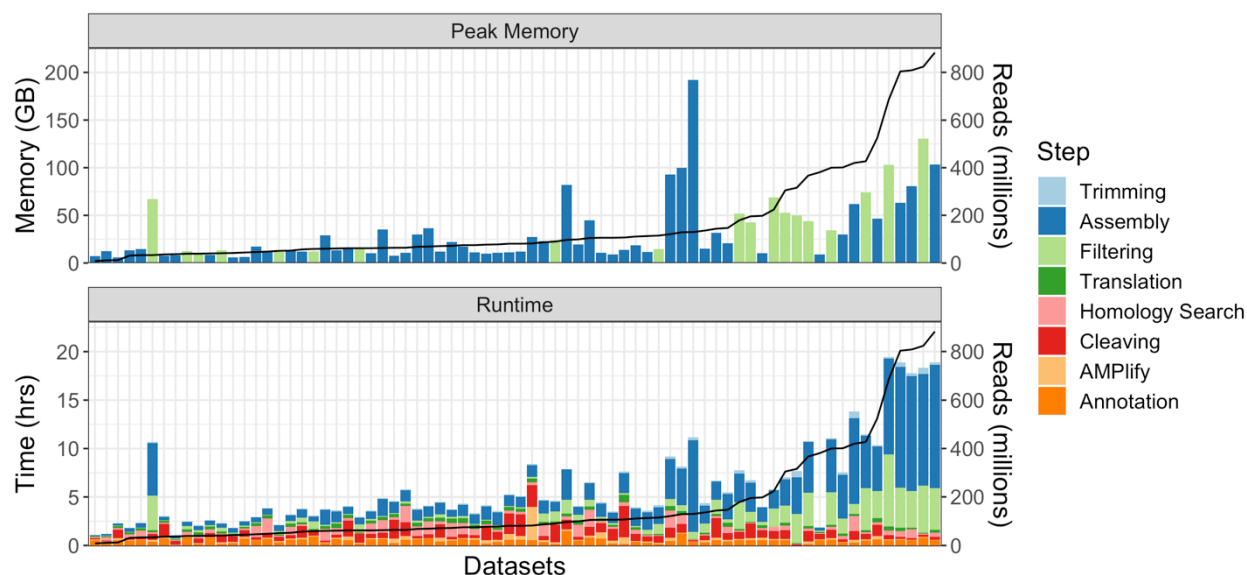

**Figure S1. Runtime and memory of each dataset through rAMPage**

Datasets with > 1 billion reads (not depicted) finished within one week. Benchmarking statistics time (hours) and peak memory (GB) of each dataset through rAMPage, ordered from least to most reads. For these datasets, rAMPage was run using 48 threads on a CentOS 7.6 machine equipped with an Intel Xeon E5-2650 @ 2.20 GHz CPU with 380 GB of available RAM and 48 cores. Two large datasets failed to run on that machine and were run on a CentOS 7.6 machine equipped with an Intel Xeon E7-8860 v3 @ 2.20 GHz CPU with 1500GB of available RAM and 128 cores.

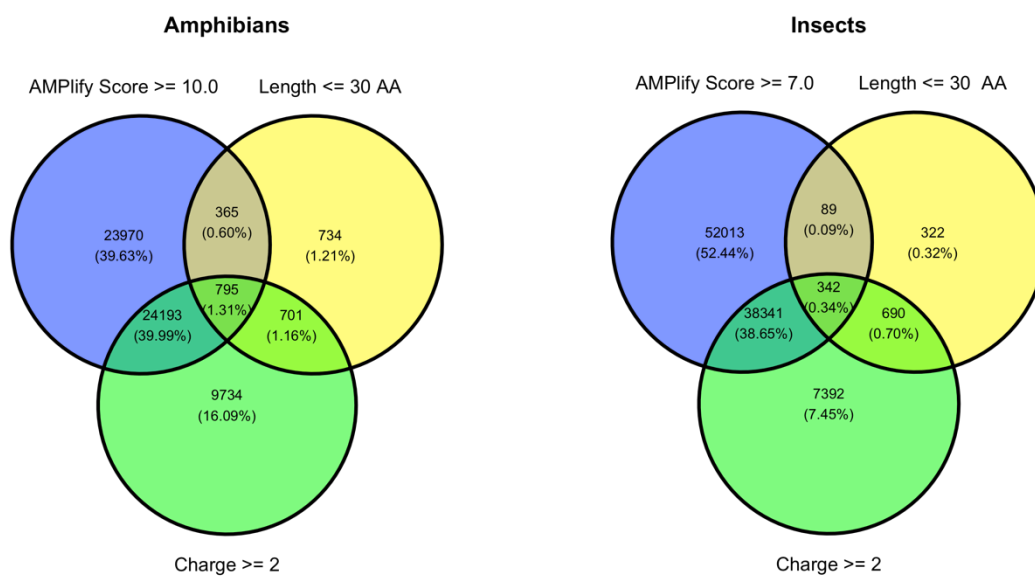

**Figure S2. Putative AMP filters used for amphibians and insects**

Amphibians have a higher threshold for AMPlify score as a filter than the insects do. Other filters remain the same.

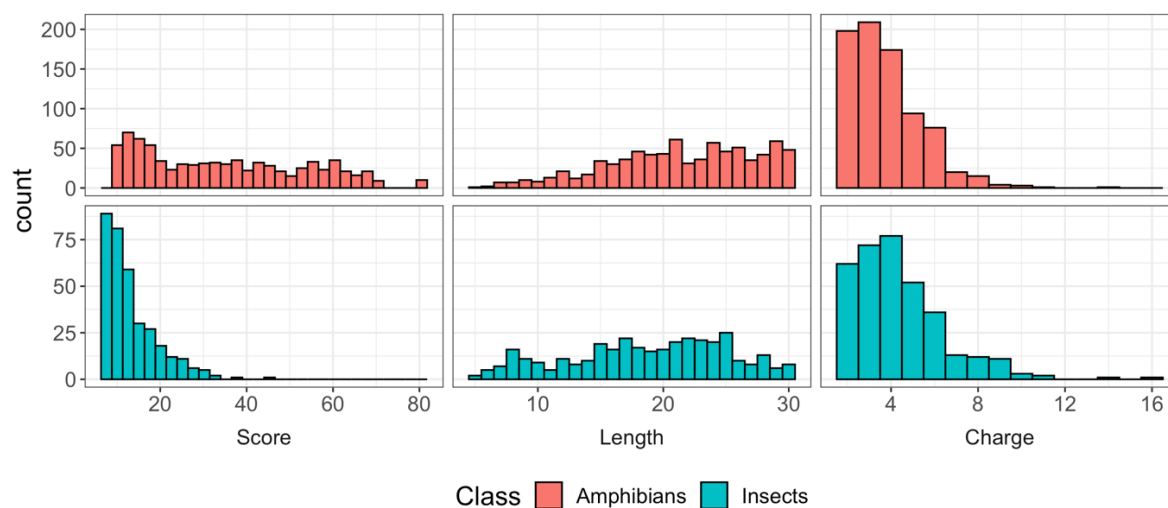

**Figure S3. Score, length, and charge distribution of filtered putative AMPs**

AMPs tend to be positively charged, they are most commonly between +2 and +9. Histogram is coloured by taxonomic class.

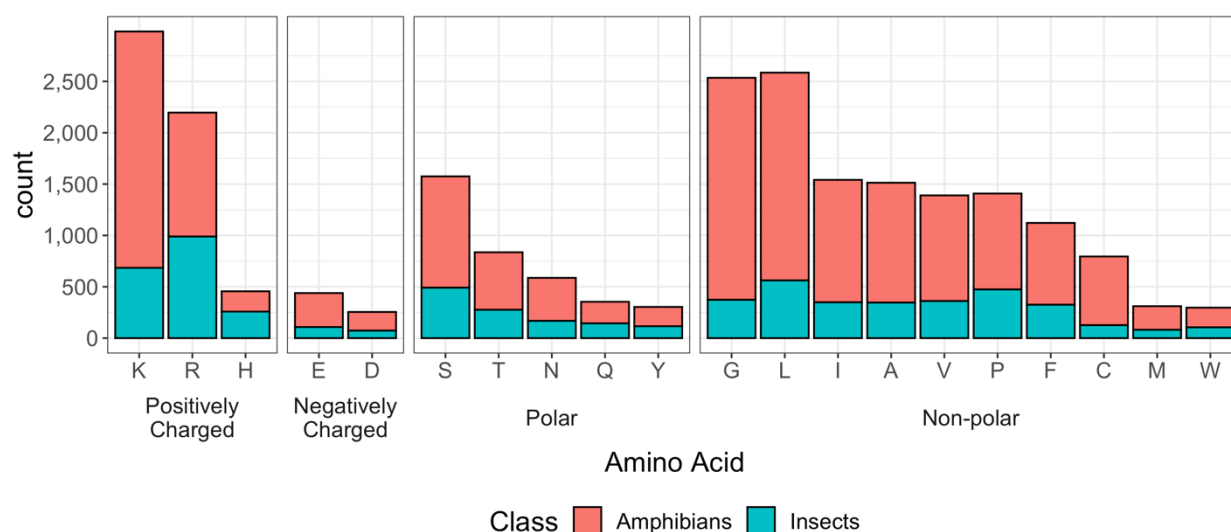

**Figure S4. Amino acid composition of filtered putative AMPs**

In the filtered set of putative AMPs, there are more positively charged amino acids than there are negatively charged ones. The three positively charged amino acids give the AMPs their overall positive charge. There also seems to be a higher composition of non-polar residues as well, allowing for easier insertion into the hydrophobic layer of target cell membranes. Histograms are organized by amino acid characteristic and coloured by taxonomic class.

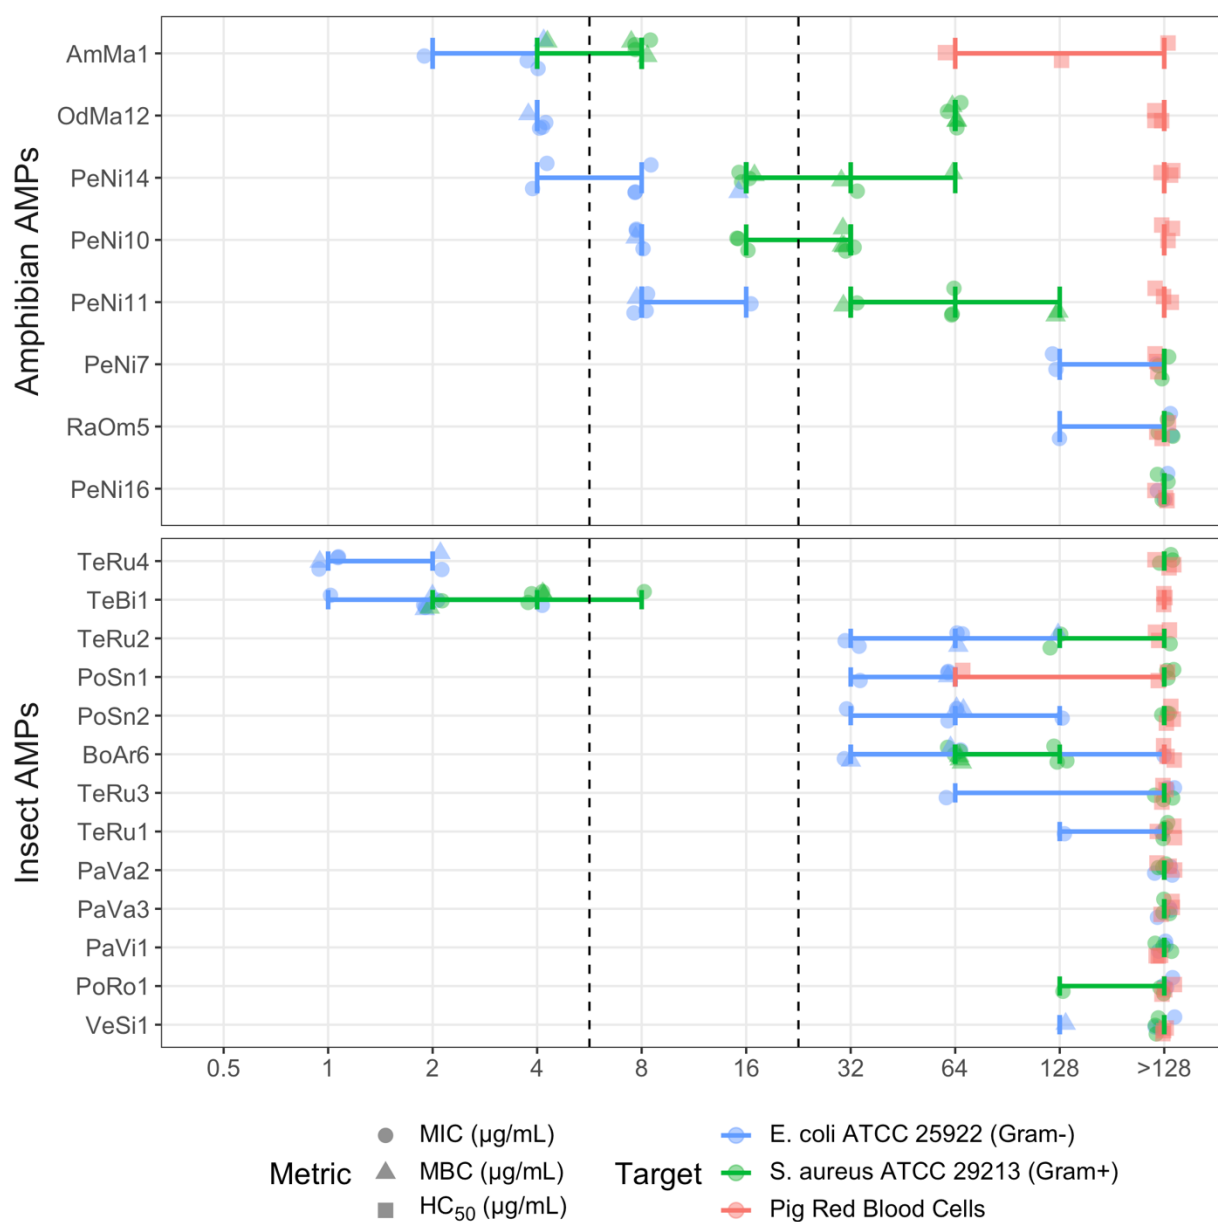

**Figure S5. Antimicrobial susceptibility and hemolysis testing of 21 putative AMPs**

Twenty-one putative AMPs were tested ( $n = 3$ ) for bioactivity against *E. coli* and *S. aureus* to determine MIC and MBC values, and then tested ( $n = 3$ ) for their hemolytic activity against pig red blood cells to determine HC<sub>50</sub> values.

Multiple sequence alignments [1] of moderate- to highly active putative AMPs and their top blastp hit(s).

CLUSTAL O(1.2.4) multiple sequence alignment

[illegible]



Multiple sequence alignments [1] of moderate- to highly active putative AMP complete and partial precursors found in multiple species.

|                                          |                                                                                          |    |
|------------------------------------------|------------------------------------------------------------------------------------------|----|
| pnigromaculatus-skin-28243.p1            | -----RLSLAHKETRRPSLLLLFFLGMVLSLSLCEQERDADEDEGEVT                                         | 42 |
| pnigromaculatus-skin_irradiated-54894.p1 | -----SRHQLNYLNSNYPQSPKMF <sup>1</sup> LRKSLLLLLFFLGIVLSLSLCEQERDADEDEGEVT                | 53 |
| bgargarizans-skin-105652.p1              | -----LHSR <sup>2</sup> HQLNYL-----SPKMF <sup>1</sup> LRKSLLLLLFFLGMVLSLSLCEQERDADEDEGEVT | 49 |
| pmegacephalus-skin-141158.p2             | KFSSCLHSR <sup>2</sup> HQLNYL-----SPKMF <sup>1</sup> LRKSLLLLLFFLGMVLSLSLCEQERDADEDEGEVT | 54 |

|                                          |                                           |    |
|------------------------------------------|-------------------------------------------|----|
| pnigromaculatus-skin_hallowell-125986.p2 | -----MFTLRKSLLLLFFLGMVSLSLCEQERDADEDEGEVT | 36 |
| romeimontis-skin-433262.p1               | -----MFTLRKSLLLLFFLGMVSLSLCEQERDADEDEGEVT | 36 |
|                                          | * * *****:*****                           |    |
| pnigromaculatus-skin-28243.p1            | EEVKRGLWTTIKEGVKNFSVGVLDKIRCKITGGC        | 76 |
| pnigromaculatus-skin_irradiated-54894.p1 | EEVKRGLWTTIKEGVKNFSVGVLDKIRCKITGGC        | 87 |
| bgargarizans-skin-105652.p1              | EEVKRGLWTTIKEGVKNFSVGVLDKIRCKITGGC        | 83 |
| pmegacephalus-skin-141158.p2             | EEVKRGLWTTIKEGVKNFSVGVLDKIRCKITGGC        | 88 |
| pnigromaculatus-skin_hallowell-125986.p2 | EEVKRGLWTTIKEGVKNFSVGVLDKIRCKITGGC        | 70 |
| romeimontis-skin-433262.p1               | EEVKRGLWTTIKEGVKNFSVGVLDKIRCKITGGC        | 70 |
|                                          | *****                                     |    |

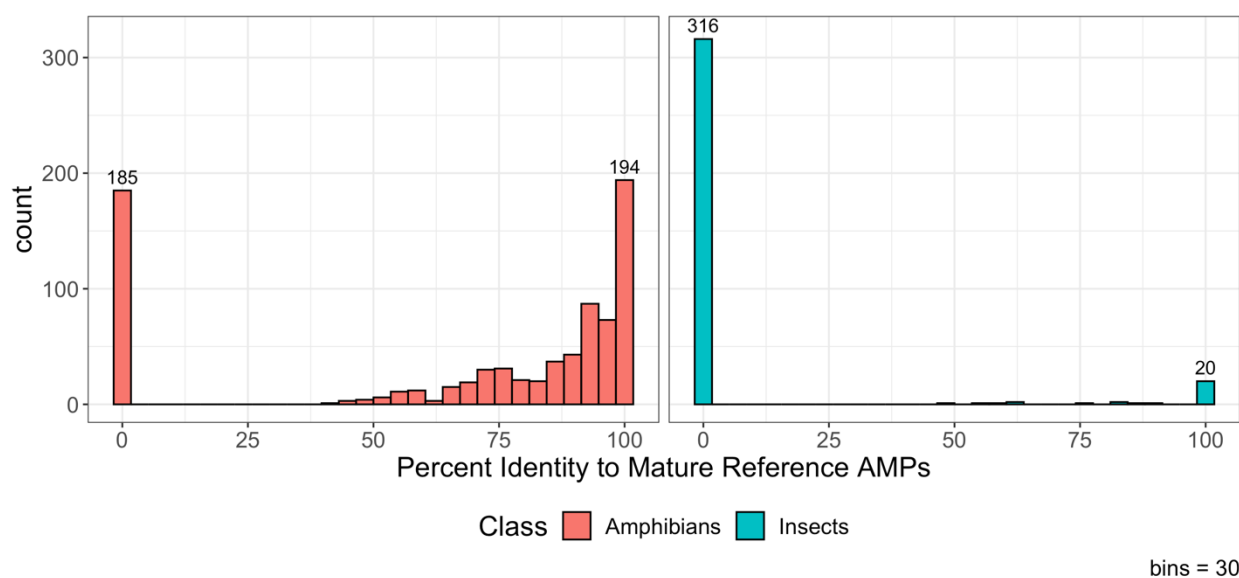

**Figure S8. Distribution of alignment of filtered putative AMPs to mature reference AMPs**

A total of 1,137 putative AMPs were identified. In our amphibian filtered putative AMP set ( $n = 795$ ; red bars), there were 194 known AMPs, and 185 novel sequences with no alignments to known amphibian AMPs. In comparison, the filtered insect putative AMPs ( $n = 342$ ; blue bars) skewed towards truly novel AMPs ( $n = 316$ ). As for somewhat novel putative AMPs, there are more amphibian putative AMPs than insect AMPs, presumably because there are more known amphibian AMPs for alignment.

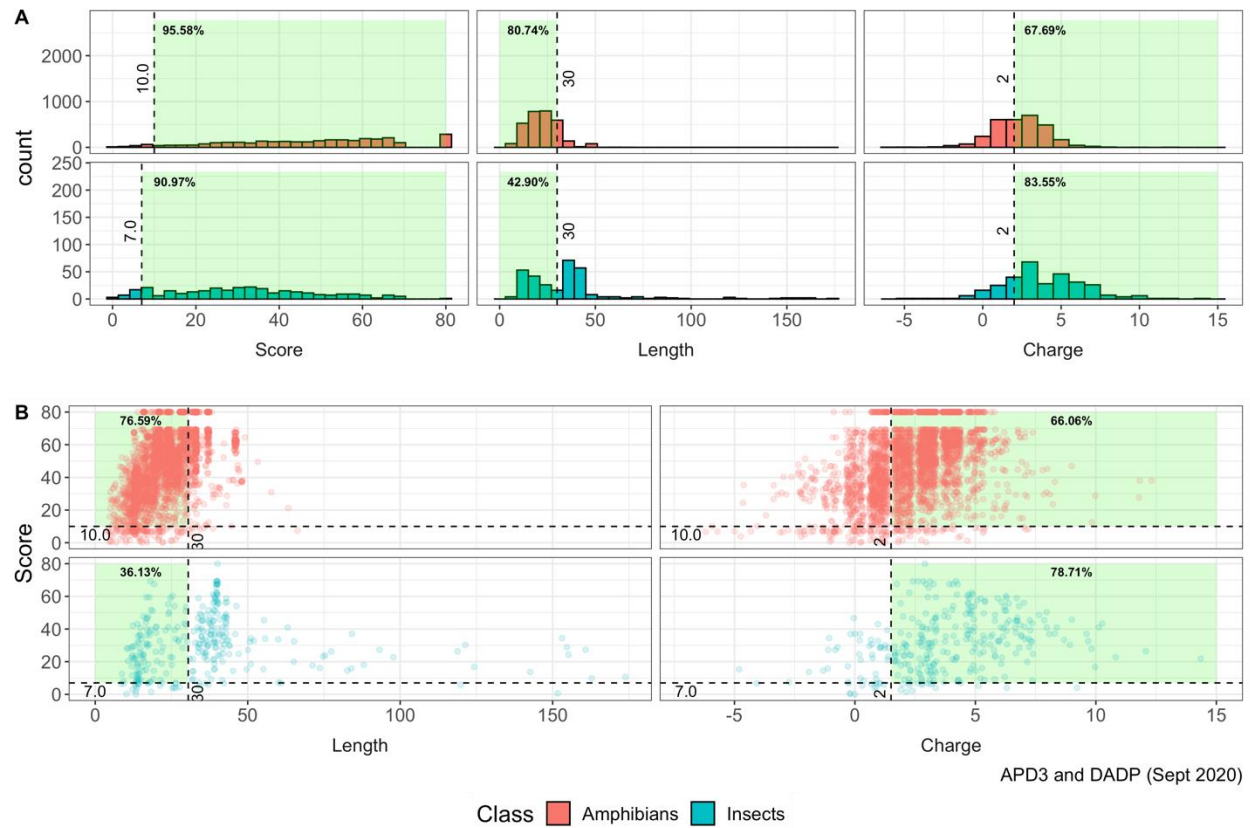

**Figure S9. Distribution of reference mature AMPs**

(A) The score, length, and charge distribution of the reference AMPs. The percentages above within the green rectangles indicate the sensitivity of the single filter. (B) The distribution of length, and charge, with respect to score. The percentages above within the green rectangles indicate the sensitivity of two filters.

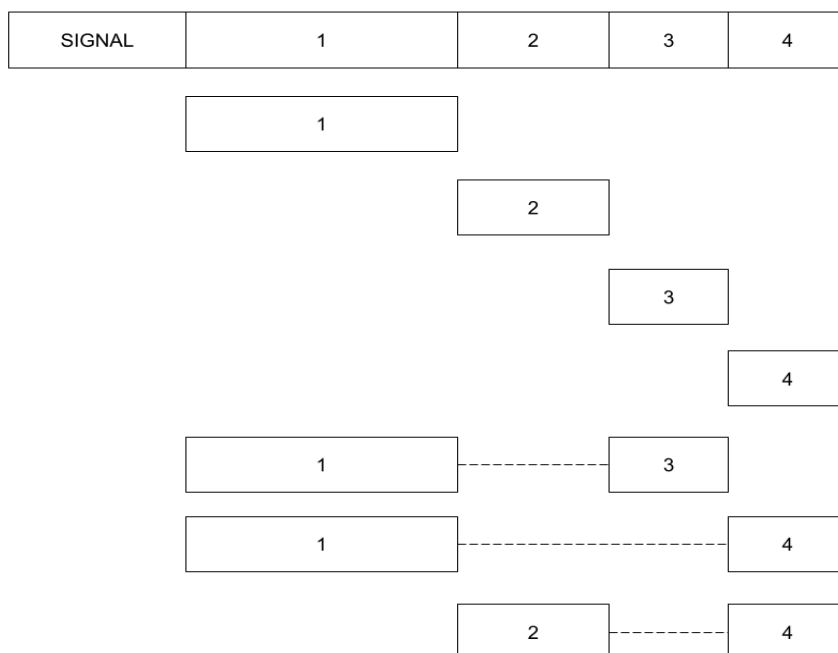

**Figure S10. Approach for peptides with multiple cleavage sites**

Cleaved peptides are combined together in a way that preserves order and orientation. Dashed lines represent excised (cleaved) pieces, and “re-stitching” of remaining pieces, in a manner similar to alternative splicing. Recombined sequences are stored in a separate file and can be filtered out if desired. Implemented in Python v3.7.7.

**Table S1. Peptide naming convention**

Legend for the peptide naming convention. The first two letters of the binomial species name are taken to form the abbreviated peptide prefix. Binomial and common names taken from the NCBI [2] Taxonomy Browser.

| Name | Binomial Name                     | Common Name or Description |
|------|-----------------------------------|----------------------------|
| AmMa | <i>Amolops mantzorum</i>          | Mouping sucker frog        |
| BoAr | <i>Bombus ardens</i>              | Bumblebee                  |
| OdMa | <i>Odorrana margaretae</i>        | Green odorous frog         |
| PaVa | <i>Parapolybia varia</i>          | Lesser paper wasp          |
| PaVi | <i>Pachycrepoideus vindemmiae</i> | Parasitic wasp             |
| PeNi | <i>Pelophylax nigromaculatus</i>  | Dark-spotted frog          |
| PoRo | <i>Polistes rothneyi</i>          | Polistine wasp             |
| PoS  | <i>Polistes snelleni</i>          | Japanese paper wasp        |
| RaOm | <i>Rhacophorus omeimontis</i>     | Omei tree frog             |
| RaSy | <i>Rana sylvatica</i>             | Wood frog                  |
| TeBi | <i>Tetramorium bicarinatum</i>    | Tramp ant                  |
| TeRu | <i>Temnothorax rugatulus</i>      | Small myrmicine ant        |
| VeSi | <i>Vespa simillima</i>            | Japanese hornet            |

**Table S2. Subset of 21 putative AMPs synthesized and validated against *E. coli* and *S. aureus*.**

The prioritization methodology and AMPlify score for each validated AMP are indicated along with the derived mature peptide sequences and their characteristics. Refer to Table S1 for the naming convention.

| Name   | Sequence                       | Class    | AMPlify Score | Length | Charge | Prioritization Methodology |
|--------|--------------------------------|----------|---------------|--------|--------|----------------------------|
| AmMa1  | GILDTLKQLGKAAVQGLLSKAACKLAKTC  | Amphibia | 80.0          | 29     | 4      | AMPlify Score              |
| OdMa12 | GFMDTAKNVAKNVAVTLLYNLKCKITKAC  | Amphibia | 69.2          | 29     | 4      | AMPlify Score              |
| PeNi14 | GLWTTIKEGVKNFSVGVLDKIRCKITGGC  | Amphibia | 67.5          | 29     | 3      | Species Count              |
| PeNi10 | GLLLDTVKGAAKNVAGILLNKLKCKVTGDC | Amphibia | 61.8          | 30     | 3      | Species Count              |
| PeNi11 | GILDTLKGAAKNVAGVLLDKLKCKITGGC  | Amphibia | 61.8          | 30     | 3      | Species Count              |
| PeNi7  | VIPFVASVAAEMMHVYCAASKRCKN      | Amphibia | 43.2          | 26     | 2      | Species Count              |
| RaOm5  | AGYSRMIRPPGFSPFRVAPASSLKR      | Amphibia | 12.5          | 26     | 6      | Species Count              |
| PeNi16 | ATAWKVPPGLQPIRPIRIRPLCGNDKS    | Amphibia | 26.6          | 27     | 4      | Species Count              |
| TeRu4  | SWLSKSVKKLVNKKNYTRLEKLAKKKLFNE | Insecta  | 25.5          | 30     | 8      | Insect Peptide             |
| TeBi1  | KIKIPWGKVKDFLVGGMKAVGKK        | Insecta  | 45.0          | 23     | 6      | Insect Peptide             |
| TeRu2  | AFVRILCYCCPRRIKRR              | Insecta  | 25.5          | 17     | 6      | Insect Peptide             |
| PoSni1 | ISIKEALEHSFFHTVPRKWCKKH        | Insecta  | 30.4          | 23     | 3      | Insect Peptide             |
| PoSni2 | TALKSLSILKKLAKLNM              | Insecta  | 23.7          | 17     | 4      | Insect Peptide             |
| BoAr6  | GILRLVTRRRFRSPTNLNRYTVARLVSGVP | Insecta  | 22.1          | 30     | 6      | Insect Peptide             |
| TeRu3  | AVLSFVHKLFLNFLHVDTSKGKCRATLQ   | Insecta  | 26.3          | 28     | 3      | Insect Peptide             |

| <b>Name</b> | <b>Sequence</b>         | <b>Class</b> | <b>AMPlify<br/>Score</b> | <b>Length</b> | <b>Charge</b> | <b>Prioritization<br/>Methodology</b> |
|-------------|-------------------------|--------------|--------------------------|---------------|---------------|---------------------------------------|
| TeRu1       | VPFGLKPR                | Insecta      | 25.8                     | 8             | 2             | Species Count                         |
| PaVa2       | KYHHIKLRHGRHRTIH        | Insecta      | 26.0                     | 17            | 6             | Insect Peptide                        |
| PaVa3       | ITEPVGTKAPTFTSELRGWLKKR | Insecta      | 24.0                     | 24            | 3             | Insect Peptide                        |
| PaVi1       | WALRWKTR                | Insecta      | 25.0                     | 8             | 3             | Insect Peptide                        |
| PoRo1       | VAAFAIIGCLCCRRPRR       | Insecta      | 23.0                     | 17            | 4             | Insect Peptide                        |
| VeSi1       | FILHAKKTRSAK            | Insecta      | 22.5                     | 12            | 4             | Insect Peptide                        |



**Table S3. Annotation of moderately to highly active putative mature AMPs**

Annotation executed with EN-TAP, Exonerate, and BLAST web server [3] when there are no significant alignments to reference AMPs.

| Name   | Species                                                                                                                                                             | Annotation                                                                                                                                                                                                                                                                                                                                                                                                                                                                             |
|--------|---------------------------------------------------------------------------------------------------------------------------------------------------------------------|----------------------------------------------------------------------------------------------------------------------------------------------------------------------------------------------------------------------------------------------------------------------------------------------------------------------------------------------------------------------------------------------------------------------------------------------------------------------------------------|
| AmMa1  | <i>Amolops mantzorum</i>                                                                                                                                            | <ul style="list-style-type: none"> <li>• ADM34231.1: Palustrin-2GN3 antimicrobial peptide precursor [<i>Amolops granulosus</i>] (93.10%) <ul style="list-style-type: none"> <li>• AP02474: Palustrin-2GN3 [<i>Hylarana taipehensis</i>] (93.10%);</li> <li>• SP_E1AXE7: Granulosin-E1 [<i>Amolops granulosus</i>] (93.10%)</li> </ul> </li> <li>• IPR012521: Frog antimicrobial peptide, brevinin-2/esculentin type</li> <li>• PF08023: Frog antimicrobial peptide</li> </ul>          |
| OdMa12 | <i>Odorrana margaretae</i>                                                                                                                                          | <ul style="list-style-type: none"> <li>• ABG76517.1: Odorranain-F2 antimicrobial peptide precursor [<i>Odorrana grahami</i>] (96.55%) <ul style="list-style-type: none"> <li>• SP_A6MBL6: Odorranain-F2 [<i>Odorrana grahami</i>] (96.55%)</li> </ul> </li> <li>• IPR012521: Frog antimicrobial peptide, brevinin-2/esculentin type</li> <li>• PF08023: Frog antimicrobial peptide</li> </ul>                                                                                          |
| PeNi10 | <i>Leptobrachium boringii</i><br><i>Polypedates megacephalus</i><br><i>Pelophylax nigromaculatus</i><br><i>Rhacophorus dennysi</i><br><i>Rhacophorus omeimontis</i> | <ul style="list-style-type: none"> <li>• AEM68233.1: Rantauerin-2N protein precursor, partial [<i>Pelophylax nigromaculatus</i>] (100%) <ul style="list-style-type: none"> <li>• AP02224: Pelophylaxin-2GY [<i>Pelophylax nigromaculatus</i>] (96.67%)</li> </ul> </li> <li>• IPR012521: Frog antimicrobial peptide, brevinin-2/esculentin type</li> <li>• PF08023: Frog antimicrobial peptide</li> </ul>                                                                              |
| PeNi11 | <i>Leptobrachium boringii</i><br><i>Polypedates megacephalus</i><br><i>Pelophylax nigromaculatus</i><br><i>Rhacophorus dennysi</i><br><i>Rhacophorus omeimontis</i> | <ul style="list-style-type: none"> <li>• AEM68231.1: Rantauerin-2N protein precursor, partial [<i>Pelophylax nigromaculatus</i>] (100%) <ul style="list-style-type: none"> <li>• AP01394: Pelophylaxin-1 [<i>Pelophylax plancyi fukienensis</i>] (100%)</li> <li>• SP_Q2WCN8: Pelophylaxin-1 [<i>Pelophylax fukienensis</i>] (100%)</li> </ul> </li> <li>• IPR012521: Frog antimicrobial peptide, brevinin-2/esculentin type</li> <li>• PF08023: Frog antimicrobial peptide</li> </ul> |
| PeNi14 | <i>Bufo gargarizans</i><br><i>Polypedates megacephalus</i><br><i>Pelophylax nigromaculatus</i><br><i>Rhacophorus omeimontis</i>                                     | <ul style="list-style-type: none"> <li>• AIU99897.1: Palustrin-2HB1 [<i>Pelophylax hubeiensis</i>] (86.21%) <ul style="list-style-type: none"> <li>• AP02834: Palustrin-2HB1 [<i>Pelophylax hubeiensis</i>] (86.21%)</li> </ul> </li> <li>• IPR012521: Frog antimicrobial peptide, brevinin-2/esculentin type</li> <li>• PF08023: Frog antimicrobial peptide</li> </ul>                                                                                                                |
| TeRu4  | <i>Temnothorax rugatulus</i>                                                                                                                                        | <ul style="list-style-type: none"> <li>• TGZ47385.1: Uncharacterized protein DBV15_00074 [<i>Temnothorax longispinosus</i>] (96.67%)</li> </ul>                                                                                                                                                                                                                                                                                                                                        |

| Name  | Species                        | Annotation                                                                                                                                                                                                                                                                                                                       |
|-------|--------------------------------|----------------------------------------------------------------------------------------------------------------------------------------------------------------------------------------------------------------------------------------------------------------------------------------------------------------------------------|
|       |                                | <ul style="list-style-type: none"> <li>P48607.3: RecName: Full=Protein spaetzle; Contains: RecName: Full=Protein spaetzle C-106; Flags: Precursor [<i>Drosophila melanogaster</i>] (36.84%)</li> </ul>                                                                                                                           |
| TeBi1 | <i>Tetramorium bicarinatum</i> | <ul style="list-style-type: none"> <li>W8GNV3.1: RecName: Full=M-myrmecitoxin(01)-Tb1a; Short=M-MYRTX(01)-Tb1a; AltName: Full=Ant peptide P16; AltName: Full=Bicarinalin; AltName: Full=Bicarinaline; AltName: Full=M-myrmecitoxin-Tb1a; Short=M-MYRTX-Tb1a; Flags: Precursor [<i>Tetramorium bicarinatum</i>] (100%)</li> </ul> |

**Table S4. Major options for rAMPage**

| <b>Option</b> | <b>Description</b>                       |
|---------------|------------------------------------------|
| -r <file>     | Reference transcriptome                  |
| -s            | Strand-specific library construction     |
| -E <e-value>  | E-value cut-off for HMMs (default: 1e-5) |
| -C <int>      | Charge cut-off (default: 2)              |
| -S <float>    | AMPlify score cut-off (default: 10)      |
| -L <int>      | Length threshold (default: 30)           |

**Table S5. Sensitivity of all putative AMP filter combinations**

| # Filters | Filter Combinations     | Sensitivity (%) |         |         |
|-----------|-------------------------|-----------------|---------|---------|
|           |                         | Amphibians      | Insects | Overall |
| 1         | Score                   | 95.58           | 90.97   | 95.15   |
|           | Length                  | 80.74           | 42.90   | 77.21   |
|           | Charge                  | 67.69           | 83.55   | 69.17   |
| 2         | Score & Length          | 76.59           | 36.13   | 72.81   |
|           | Score & Charge          | 66.06           | 78.71   | 67.24   |
|           | Length & Charge         | 49.19           | 35.16   | 47.88   |
| 3         | Score, Length, & Charge | 47.79           | 31.94   | 46.31   |

**Table S6. Amphibian RNA-seq datasets**

SRA [4] accessions for amphibian RNA-seq reads, metadata taken from the SRA Run Selector, and strand-specificity determined by the methods of each respective published paper.

| Accession(s)                                      | Species                       | Experimental Note(s)                                                                                                                                          |
|---------------------------------------------------|-------------------------------|---------------------------------------------------------------------------------------------------------------------------------------------------------------|
| SRX6761091-92;<br>SRX5102733-40                   | <i>Allobates femoralis</i>    | Strand-specific [5], skin tissue, males and females, alkaloid consumption and control; Not strand-specific [6], skin and liver tissue, males and females      |
| SRX2554903                                        | <i>Amolops mantzorum</i>      | Not strand-specific [7], mixed cerebrum, skeletal muscle, heart, liver, testicle, and skin, males                                                             |
| SRX5102747-50,<br>SRX5102773-74,<br>SRX5102777-78 | <i>Amazophrynella minuta</i>  | Not strand-specific [6], skin and liver tissue, males                                                                                                         |
| SRX5102731-32,<br>SRX5102769-72,<br>SRX5102775-76 | <i>Ameerega petersi</i>       | Not strand-specific [6], skin and liver tissue, males and females                                                                                             |
| SRX2640691                                        | <i>Bufo gargarizans</i>       | Strand-specific [8], skin tissue, adult, pooled male and female                                                                                               |
| SRX205680-84,<br>SRX206002-05                     | <i>Cyclorana alboguttata</i>  | Not strand-specific [9], adult skeletal muscle, aestivation                                                                                                   |
| SRX6761100-02;<br>ERP107602                       | <i>Dendrobates auratus</i>    | Strand-specific, skin tissue, alkaloid consumption and control, adults, males and females; Strand-specific [9], skin tissue, colour morphology, metamorphosis |
| SRX6761103-06                                     | <i>Dendrobates leucomelas</i> | Strand-specific [5], skin tissue, alkaloid consumption and control, adult, males and females                                                                  |
| SRX6761093-99,<br>SRX6761107                      | <i>Dendrobates tinctorius</i> | Strand-specific [5], skin tissue, alkaloid consumption and control, adult, males and females                                                                  |
| SRP151854                                         | <i>Hypsiboas pugnax</i>       | Strand-specific [10], skin tissue, adult                                                                                                                      |
| SRX1720190                                        | <i>Leptobrachium boringii</i> | Strand-specific [8], skin tissue, pooled male and female, terrestrial ecotype                                                                                 |

| Accession(s)                                          | Species                          | Experimental Note(s)                                                                                                                                                                                                                                                                                        |
|-------------------------------------------------------|----------------------------------|-------------------------------------------------------------------------------------------------------------------------------------------------------------------------------------------------------------------------------------------------------------------------------------------------------------|
| SRP096145                                             | <i>Litoria verreauxii</i>        | Not strand-specific [11], skin tissue, chytridiomycosis exposure, adult                                                                                                                                                                                                                                     |
| SRX1720191                                            | <i>Megophrys sangzhiensis</i>    | Strand-specific [8], skin tissue, pooled male and female, terrestrial ecotype                                                                                                                                                                                                                               |
| SRX317137;<br>SRX1720189                              | <i>Odorrana margaretae</i>       | Not strand-specific [12], mixed cerebrum, eye, skeletal muscle, heart, liver, testicle, ootheca, and tadpole tissue; Strand-specific, skin tissue, pooled male and female, semi-aquatic ecotype                                                                                                             |
| SRP124485                                             | <i>Oreolalax rhodostigmatus</i>  | Not strand-specific [13], skin, eyeball, and liver tissue, light exposure and high altitudes                                                                                                                                                                                                                |
| SRP199453                                             | <i>Oophaga sylvatica</i>         | Strand-specific [14], skin, liver, and gut tissue, alkaloid consumption and control, adult, wild type and lab reared ecotype                                                                                                                                                                                |
| SRX3845976-77                                         | <i>Odorrana tormota</i>          | Not strand-specific [15], skin tissue, adult female and males                                                                                                                                                                                                                                               |
| DRX154877                                             | <i>Pyxicephalus adspersus</i>    | Strand-specific [16], mixed skin, muscle, intestine, brain and internal organ tissue, aestivation                                                                                                                                                                                                           |
| SRX5734372                                            | <i>Pseudophilautus amboli</i>    | Not strand-specific [17], ventral skin tissue, adult, males                                                                                                                                                                                                                                                 |
| SRX1720193                                            | <i>Polypedates megacephalus</i>  | Strand-specific [8], skin tissue, pooled male and female, arboreal ecotype                                                                                                                                                                                                                                  |
| SRX5734384                                            | <i>Phrynomantis microps</i>      | Not strand-specific [17], dorsal skin tissue, adult, males                                                                                                                                                                                                                                                  |
| SRX532382;<br>SRX1720192;<br>SRX2640690;<br>SRP144311 | <i>Pelophylax nigromaculatus</i> | Not strand-specific [18], mixed brain and gonad tissue; Strand-specific [8], semi-aquatic ecotype, skin tissue, pooled male and female; Strand-specific [8], skin tissue, pooled male and female, Hallowell cultivar; Not strand-specific (GEO GSE113944), skin tissue, 30Gy radiation exposure and control |

| Accession(s)                                                                 | Species                       | Experimental Note(s)                                                                                                                                                    |
|------------------------------------------------------------------------------|-------------------------------|-------------------------------------------------------------------------------------------------------------------------------------------------------------------------|
| SRX5102741-46,<br>SRX5102761-62                                              | <i>Pristimantis toftae</i>    | Not strand-specific [6], male, skin and liver tissue, adult                                                                                                             |
| SRX2554902                                                                   | <i>Quasipaa boulengeri</i>    | Not strand-specific [7], mixed cerebrum, skeletal muscle, heart, liver, testicle, and skin tissue                                                                       |
| SRX1080472-77,<br>SRX2034988,<br>SRX2034994,<br>SRX2036208;<br>SRX2989033-59 | <i>Rana catesbeiana</i>       | Strand-specific [19], T3 exposure and control, back skin tissue, tadpoles, male; Not strand-specific [20], ventral skin tissue, fungal exposures and control, juveniles |
| SRX1720195                                                                   | <i>Rhacophorus dennysi</i>    | Strand-specific [8], pooled male and female, skin tissue, arboreal ecotype                                                                                              |
| ERP110499                                                                    | <i>Ranitomeya imitator</i>    | Strand-specific [21], skin tissue, Huallaga, Sauce, Tarapoto, Varadero ecotypes                                                                                         |
| SRX1368943                                                                   | <i>Rhacophorus omeimontis</i> | Strand-specific [8], pooled male and female, skin tissue, arboreal ecotype                                                                                              |
| SRX482652-57                                                                 | <i>Rana pipiens</i>           | Not strand-specific [22], males and females, organ tissue                                                                                                               |
| SRX5102759-60,<br>SRX5102763-68                                              | <i>Ranitomeya sirensis</i>    | Not strand-specific [6], male, skin and liver tissue, adult                                                                                                             |
| SRX2989010-32                                                                | <i>Rana sylvatica</i>         | Not strand-specific [20], fungal exposures and control, ventral skin tissue, juveniles                                                                                  |
| ERX993648-56                                                                 | <i>Rana temporaria</i>        | Not strand-specific [23], liver tissue, metamorph stage, viral and fungal exposures and control                                                                         |
| SRX5102751-58                                                                | <i>Scinax ruber</i>           | Not strand-specific [6], males and females, skin and liver tissue, adult                                                                                                |
| SRX1704778                                                                   | <i>Xenopus allofraseri</i>    | Not strand-specific [24], liver tissue, sub-adult                                                                                                                       |

| <b>Accession(s)</b> | <b>Species</b>            | <b>Experimental Note(s)</b>                                                                          |
|---------------------|---------------------------|------------------------------------------------------------------------------------------------------|
| SRX1704840          | <i>Xenopus borealis</i>   | Not strand-specific [24], adult, females, liver tissue                                               |
| SRX847156-57        | <i>Xenopus laevis</i>     | Not strand-specific [25], male, tadpole, liver tissue, T3 exposure and control                       |
| SRX1703541          | <i>Xenopus largeni</i>    | Not strand-specific [25], adult, liver tissue                                                        |
| SRX191164-68        | <i>Xenopus tropicalis</i> | Not strand-specific [26], brain, liver, kidney, heart, and skeletal muscle tissue, males and females |



**Table S7. Insect RNA-seq datasets**

SRA [4] accessions for insect RNA-seq reads, metadata taken from the SRA Run Selector, and strand-specificity determined by the methods of each respective published paper.

| Accession(s)             | Species                              | Experimental Note(s)                                                            |
|--------------------------|--------------------------------------|---------------------------------------------------------------------------------|
| SRP083113                | <i>Apis cerana</i>                   | Not strand-specific [27], gut tissue, fungal exposure, subspecies <i>cerana</i> |
| SRX2414288               | <i>Ampulex compressa</i>             | Not strand-specific [28], venom gland and venom sac tissue, adult               |
| ERP002002                | <i>Acromyrmex echinator</i>          | Not strand-specific [29], fungal exposures and control                          |
| SRX6999815               | <i>Anterhynchium flavomarginatum</i> | Not strand-specific [30], venom gland tissue                                    |
| SRP117554                | <i>Apis mellifera</i>                | Strand-specific [31], gut tissue, parasitic exposure                            |
| SRX6999805               | <i>Bombus ardens</i>                 | Not strand-specific [30], venom gland tissue                                    |
| SRX6999806               | <i>Bombus consobrinus</i>            | Not strand-specific [30], venom gland tissue                                    |
| SRX5818710               | <i>Bracon nigricans</i>              | Strand-specific [32], venom gland tissue, females, adult                        |
| SRX6999807               | <i>Bombus ussurensis</i>             | Not strand-specific [30], venom gland tissue                                    |
| SRP057573                | <i>Camponotus castaneus</i>          | Strand-specific [33], head tissue, fungal infection and control                 |
| SRP069794                | <i>Cardiocondyla obscurior</i>       | Not strand-specific [34], female, whole body tissue, injured                    |
| SRX1973411,<br>SRX377438 | <i>Cotesia vestalis</i>              | Not strand-specific [35], adult, venom gland tissue                             |
| SRX2190163,<br>SRX371684 | <i>Diadromus collaris</i>            | Not strand-specific [35], adult, female, venom gland tissue                     |
| SRX7651835               | <i>Diachasmimorpha longicaudata</i>  | Strand-specific [36], female, venom gland tissue, unemerged adult               |
| SRX337940                | <i>Microplitis demolitor</i>         | Not strand-specific [37], venom gland tissue                                    |

| Accession(s)                           | Species                                                    | Experimental Note(s)                                                                                                                                           |
|----------------------------------------|------------------------------------------------------------|----------------------------------------------------------------------------------------------------------------------------------------------------------------|
| SRX3556750                             | <i>Myrmecia gulosa</i>                                     | Strand-specific [38], venom apparatus tissue                                                                                                                   |
| SRX2241561                             | <i>Nasonia giraulti</i>                                    | Not strand-specific [39], venom gland and venom reservoir tissue, adult female                                                                                 |
| SRX2263332                             | <i>Nasonia vitripennis</i> x<br><i>Nasonia giraulti</i> F1 | Not strand-specific [39], venom gland and venom reservoir tissue                                                                                               |
| SRP120985;<br>SRX2241560;<br>SRP067692 | <i>Nasonia vitripennis</i>                                 | Not strand-specific [40], females, head tissue; Not strand-specific [39], venom gland tissue, adult female; Strand-specific [41], venom gland and ovary tissue |
| SRX6999813                             | <i>Oreumenes decoratus</i>                                 | Not strand-specific [30], venom gland tissue                                                                                                                   |
| DRR093871                              | <i>Odontomachus monticola</i>                              | Strand-specific [42], venom gland and venom sac tissue                                                                                                         |
| DRP002507                              | <i>Pogonomyrmex barbatus</i>                               | Not strand-specific [43], larva, pupae, and adult stages, worker and gyne castes, males                                                                        |
| SRX6999811                             | <i>Polistes rothneyi</i>                                   | Not strand-specific [30], venom gland tissue                                                                                                                   |
| SRX6999812                             | <i>Polistes snelleni</i>                                   | Not strand-specific [30], venom gland tissue                                                                                                                   |
| SRX6653167                             | <i>Pimpla turionellae</i>                                  | Not strand-specific [44], female, venom gland tissue                                                                                                           |
| SRX6999810                             | <i>Parapolybia varia</i>                                   | Not strand-specific [30], venom gland tissue                                                                                                                   |
| SRX6897943-45                          | <i>Pachycrepoideus vindemmiae</i>                          | Not strand-specific [45], female, venom apparatus tissue                                                                                                       |
| SRX6999804                             | <i>Sceliphron deforme</i>                                  | Not strand-specific [30], venom gland tissue                                                                                                                   |
| SRX6999814                             | <i>Sphecidae</i> sp. KJ-8906                               | Not strand-specific [30], venom gland tissue                                                                                                                   |
| SRX424883                              | <i>Tetramorium bicarinatum</i>                             | Not strand-specific [46], venom gland tissue                                                                                                                   |
| SRP133940                              | <i>Temnothorax rugatulus</i>                               | Not strand-specific [47], old and young age, brain and fat body tissue, queens                                                                                 |

| Accession(s) | Species                           | Experimental Note(s)                                                           |
|--------------|-----------------------------------|--------------------------------------------------------------------------------|
| SRX2241559   | <i>Trichomalopsis sarcophagae</i> | Not strand-specific [39], adult female, venom gland and venom reservoir tissue |
| SRX2241558   | <i>Urolepis rufipes</i>           | Not strand-specific [39], adult female, venom gland and venom reservoir tissue |
| SRX6999802   | <i>Vespa analis</i>               | Not strand-specific [30], venom gland tissue                                   |
| SRX6999803   | <i>Vespa crabro</i>               | Not strand-specific [30], venom gland tissue                                   |
| SRX6999808   | <i>Vespa dybowskii</i>            | Not strand-specific [30], venom gland tissue                                   |
| SRX6999809   | <i>Vespa simillima</i>            | Not strand-specific [30], venom gland tissue                                   |

**Table S8. Breakdown of AMP sequences in AMP databases**

AMP sequences across the APD3, DADP, and NCBI (nr) databases. The number of newly added sequences as of May 10, 2021 compared to date the shown below each database name are indicated in bold. The last column “All” includes all AMP sequences in the database, regardless of organism of origin. There is no “All” number for NCBI on Jul. 2020. NCBI search terms used: antimicrobial[All Fields] AND (amphibia[organism] OR insecta[organism]).

| Database                       | Amphibians       | Insects          | All              |
|--------------------------------|------------------|------------------|------------------|
| APD3<br>Sep. 2020 (release)    | 1,075 <b>+34</b> | 310 <b>+13</b>   | 3,125 <b>+97</b> |
| DADP<br>Sep. 2020 (downloaded) | 1,921            | 0                | 1,921            |
| NCBI<br>Jul. 2020 (downloaded) | 2,850 <b>+41</b> | 985 <b>+57</b>   | <b>+185,967</b>  |
| Reference AMPs                 | 4,663 <b>+73</b> | 1,204 <b>+62</b> | N/A              |

**Table S9. Shell scripting dependencies of rAMPage**

| <b>Dependency</b> | <b>Tested Version</b> |
|-------------------|-----------------------|
| GNU bash          | 5.0.11(1)             |
| GNU make          | 4.3                   |
| GNU awk           | 5.0.1                 |
| GNU sed           | 4.8                   |
| GNU grep          | 3.4                   |
| GNU column        | 2.36                  |
| Miller mlr        | 5.4.0                 |
| bc                | 1.07.1                |
| gzip              | 1.10                  |
| Python            | 3.7.7                 |
| Rscript*          | 4.0.2                 |

\*requires tidyverse v1.3.0, glue v1.4.2, and docopt v0.7.1

**Table S10. Bioinformatic tool dependencies of rAMPage**

| <b>Tool</b>       | <b>Tested Version</b> | <b>Source</b>                                                                                                                                                             |
|-------------------|-----------------------|---------------------------------------------------------------------------------------------------------------------------------------------------------------------------|
| fastp [48]        | 0.20.0                | <a href="https://github.com/OpenGene/fastp/releases/tag/v0.20.0">https://github.com/OpenGene/fastp/releases/tag/v0.20.0</a>                                               |
| RNA-Bloom [49]    | 1.3.1                 | <a href="https://github.com/bcgsc/RNA-Bloom/releases/tag/v1.3.1">https://github.com/bcgsc/RNA-Bloom/releases/tag/v1.3.1</a>                                               |
| Salmon [50]       | 1.3.0                 | <a href="https://github.com/COMBINE-lab/salmon/releases/tag/v1.3.0">https://github.com/COMBINE-lab/salmon/releases/tag/v1.3.0</a>                                         |
| TransDecoder [51] | 5.5.0                 | <a href="https://github.com/TransDecoder/TransDecoder/releases/tag/TransDecoder-v5.5.0">https://github.com/TransDecoder/TransDecoder/releases/tag/TransDecoder-v5.5.0</a> |
| HMMER [52]        | 3.3.1                 | <a href="https://github.com/EddyRivasLab/hmmer/releases/tag/hmmer-3.3.1">https://github.com/EddyRivasLab/hmmer/releases/tag/hmmer-3.3.1</a>                               |
| CD-HIT [53]       | 4.8.1                 | <a href="https://github.com/weizhongli/cdhit/releases/tag/V4.8.1">https://github.com/weizhongli/cdhit/releases/tag/V4.8.1</a>                                             |
| seqtk             | 1.1-r91               | <a href="https://github.com/lh3/seqtk/releases/tag/v1.1">https://github.com/lh3/seqtk/releases/tag/v1.1</a>                                                               |
| SignalP           | 3.0                   | <a href="https://services.healthtech.dtu.dk/services/SignalP-5.0/9-Downloads.php#">https://services.healthtech.dtu.dk/services/SignalP-5.0/9-Downloads.php#</a>           |
| ProP [54]         | 1.0c                  | <a href="https://services.healthtech.dtu.dk/services/ProP-1.0/9-Downloads.php#">https://services.healthtech.dtu.dk/services/ProP-1.0/9-Downloads.php#</a>                 |
| AMPlify [55]      | 1.0.0                 | <a href="https://github.com/bcgsc/AMPlify/releases/tag/v1.0.3">https://github.com/bcgsc/AMPlify/releases/tag/v1.0.3</a>                                                   |
| EnTAP [56]        | 0.10.7-beta           | <a href="https://github.com/harta55/EnTAP/tree/v0.10.7-beta">https://github.com/harta55/EnTAP/tree/v0.10.7-beta</a>                                                       |
| Exonerate [57]    | 2.4.0                 | <a href="https://www.ebi.ac.uk/about/vertebrate-genomics/software/exonerate">https://www.ebi.ac.uk/about/vertebrate-genomics/software/exonerate</a>                       |
| SABLE [58]        | 4.0                   | <a href="https://sourceforge.net/projects/meller-sable/">https://sourceforge.net/projects/meller-sable/</a>                                                               |
| Clustal Omega [1] | 1.2.4                 | <a href="http://www.clustal.org/omega/">http://www.clustal.org/omega/</a>                                                                                                 |

**Table S11. Command and parameters for each step of rAMPage**

| Step                            | Command and Parameters                                                                                                                                                                                                                                                                                                                                                                                                                                                                                                                                  |
|---------------------------------|---------------------------------------------------------------------------------------------------------------------------------------------------------------------------------------------------------------------------------------------------------------------------------------------------------------------------------------------------------------------------------------------------------------------------------------------------------------------------------------------------------------------------------------------------------|
| Trimming reads                  | <pre>fastp --disable-quality-filtering --detect_adapter_for_pe --in reads_1.fastq.gz --out1 reads_1.fastq.gz [--in2 reads_2.fastq.gz --out2 reads_2.fastq.gz] --unpaired1 unpaired/reads_1.fastq.gz --unpaired2 unpaired/reads_2.fastq.gz] --json report.json --html report.html --thread num_threads</pre>                                                                                                                                                                                                                                             |
| Transcriptome assembly          | <pre>java -jar RNA-Bloom.jar -f 25-75:5 -ntcard -fpr 0.005 -extend -t num_threads -pool readlist.txt -revcomp-right -mergpool -outdir output_dir -ref reference.fa [-stranded]</pre>                                                                                                                                                                                                                                                                                                                                                                    |
| Filtering misassemblies         | <pre>salmon index --transcripts assembly.fa --index index_name --threads num_threads  salmon quant --index index_name --threads num_threads -l lib_type -1 reads_1.fastq.gz -2 reads_2.fastq.gz -o output_dir # produces a quant.sf file  seqtk subseq assembly.fa &lt;(awk -v var=1 '{if (\$4&gt;=print \$1}' quant.sf) &gt; assembly.filtered.fa</pre>                                                                                                                                                                                                |
| <i>in silico</i> translation    | <pre>TransDecoder.LongOrfs -O output_dir -m 50 -t assembly.filtered.fa TransDecoder.Predict -O output_dir -t assembly.filtered.fa # produces assembly.filtered.fa.transdecoder.pep</pre>                                                                                                                                                                                                                                                                                                                                                                |
| Homology search                 | <pre>jackhmmer -o jackhmmer.out --tblout jackhmmer.tbl --cpu num_threads --noali --notextw - E 1e-5 reference_amps.faa assembly.filtered.fa.transdecoder.pep  seqtk subseq assembly.filtered.fa.transdecoder.pep &lt;(awk '!/^#/ {print \$1}' jackhmmer.tbl   sort -u) &gt; jackhmmer.faa</pre>                                                                                                                                                                                                                                                         |
| Propeptide cleavage             | <pre>prop -p -s jackhmmer.faa # produces prop.tsv python3 cleave-seq.py jackhmmer.faa prop.tsv output_dir # produces cleaved.faa</pre>                                                                                                                                                                                                                                                                                                                                                                                                                  |
| Prioritization and filtering    | <pre>python3 AMPlify.py --model_dir model_dir -s cleaved.faa --out_dir output_dir --out_format txt # produces AMPlify_results.tsv  seqtk subseq cleaved.faa &lt;(awk -F "\t" '{if(\$3&lt;=30 &amp;&amp; \$4&gt;=[10 7] &amp;&amp; \$6&gt;=2) print \$1}' AMPlify_results.tsv) &gt; amps.score_10 7-length_30-charge_2.nr.faa # amphibian insect threshold</pre>                                                                                                                                                                                         |
| Annotation and characterization | <pre>EnTAP --runP -i amps.score_0.90-length_30-charge_2.nr.faa -t num_threads --ini config.ini --out-dir output_dir -d nr.dmnd -d uniprot_sprot.diamond vertebrate_other_protein.dmnd  interproscan.sh -i amps.score_0.90-length_30-charge_2.nr.faa -b output_dir --seqtype p -- tempdir temp_dir --goterms --iprlookup --pathways  exonerate --query amps.score_0.90-length_30-charge_2.nr.faa --target reference_amps.faa --querytype protein --targettype protein --ryo "Summary: %qi\t%ti\t%td\t%pi\n" --showvulgar false --score 0 --bestn 1</pre> |

## REFERENCES

1. Sievers, F.; Wilm, A.; Dineen, D.; Gibson, T.J.; Karplus, K.; Li, W.; Lopez, R.; McWilliam, H.; Remmert, M.; Söding, J.; et al. Fast, Scalable Generation of High-Quality Protein Multiple Sequence Alignments Using Clustal Omega. *Mol Syst Biol* **2011**, *7*, 539, doi:10.1038/msb.2011.75.
2. NCBI Resource Coordinators. Database Resources of the National Center for Biotechnology Information. *Nucleic Acids Res* **2016**, *44*, D7–D19, doi:10.1093/nar/gkv1290.
3. Johnson, M.; Zaretskaya, I.; Raytselis, Y.; Merezuk, Y.; McGinnis, S.; Madden, T.L. NCBI BLAST: A Better Web Interface. *Nucleic Acids Research* **2008**, *36*, W5–W9, doi:10.1093/nar/gkn201.
4. Leinonen, R.; Sugawara, H.; Shumway, M.; on behalf of the International Nucleotide Sequence Database Collaboration The Sequence Read Archive. *Nucleic Acids Research* **2011**, *39*, D19–D21, doi:10.1093/nar/gkq1019.
5. Sanchez, E.; Rodríguez, A.; Grau, J.H.; Lötters, S.; Künzel, S.; Saporito, R.A.; Ringler, E.; Schulz, S.; Wollenberg Valero, K.C.; Vences, M. Transcriptomic Signatures of Experimental Alkaloid Consumption in a Poison Frog. *Genes* **2019**, *10*, 733, doi:10.3390/genes10100733.
6. Siu-Ting, K.; Torres-Sánchez, M.; San Mauro, D.; Wilcockson, D.; Wilkinson, M.; Pisani, D.; O’Connell, M.J.; Creevey, C.J. Inadvertent Paralog Inclusion Drives Artifactual Topologies and Timetree Estimates in Phylogenomics. *Molecular Biology and Evolution* **2019**, *36*, 1344–1356, doi:10.1093/molbev/msz067.
7. Xia, Y.; Luo, W.; Yuan, S.; Zheng, Y.; Zeng, X. Microsatellite Development from Genome Skimming and Transcriptome Sequencing: Comparison of Strategies and Lessons from Frog Species. *BMC Genomics* **2018**, *19*, 886, doi:10.1186/s12864-018-5329-y.
8. Fan, W.; Jiang, Y.; Zhang, M.; Yang, D.; Chen, Z.; Sun, H.; Lan, X.; Yan, F.; Xu, J.; Yuan, W. Comparative Transcriptome Analyses Reveal the Genetic Basis Underlying the Immune Function of Three Amphibians’ Skin. *PLoS ONE* **2017**, *12*, e0190023, doi:10.1371/journal.pone.0190023.
9. Reilly, B.D.; Schluppius, D.I.; Cramp, R.L.; Ebert, P.R.; Franklin, C.E. Frogs and Estivation: Transcriptional Insights into Metabolism and Cell Survival in a Natural Model of Extended Muscle Disuse. *Physiological Genomics* **2013**, *45*, 377–388, doi:10.1152/physiolgenomics.00163.2012.
10. Liscano Martinez, Y.; Arenas Gómez, C.M.; Smith, J.; Delgado, J.P. A Tree Frog (Boana Pugnax) Dataset of Skin Transcriptome for the Identification of Biomolecules with Potential Antimicrobial Activities. *Data in Brief* **2020**, *32*, 106084, doi:10.1016/j.dib.2020.106084.
11. Grogan, L.F.; Mulvenna, J.; Gummer, J.P.A.; Scheele, B.C.; Berger, L.; Cashins, S.D.; McFadden, M.S.; Harlow, P.; Hunter, D.A.; Trengove, R.D.; et al. Survival, Gene and Metabolite Responses of Litoria Verreauxii Alpina Frogs to Fungal Disease Chytridiomycosis. *Sci Data* **2018**, *5*, 180033, doi:10.1038/sdata.2018.33.
12. Qiao, L.; Yang, W.; Fu, J.; Song, Z. Transcriptome Profile of the Green Odorous Frog (*Odorrana Margaretae*). *PLoS One* **2013**, *8*, e75211, doi:10.1371/journal.pone.0075211.
13. Chang, L.; Zhu, W.; Shi, S.; Zhang, M.; Jiang, J.; Li, C.; Xie, F.; Wang, B. Plateau Grass and Greenhouse Flower? Distinct Genetic Basis of Closely Related Toad Tadpoles Respectively Adapted to High Altitude and Karst Caves. *Genes (Basel)* **2020**, *11*, E123, doi:10.3390/genes11020123.
14. Caty, S.N.; Alvarez-Buylla, A.; Byrd, G.D.; Vidoudez, C.; Roland, A.B.; Tapia, E.E.; Budnik, B.; Trauger, S.A.; Coloma, L.A.; O’Connell, L.A. Molecular Physiology of Chemical Defenses in a Poison Frog. *Journal of Experimental Biology* **2019**, jeb.204149, doi:10.1242/jeb.204149.
15. Shu, Y.; Xia, J.; Yu, Q.; Wang, G.; Zhang, J.; He, J.; Wang, H.; Zhang, L.; Wu, H. Integrated Analysis of mRNA and miRNA Expression Profiles Reveals Muscle Growth Differences between Adult Female and Male Chinese Concave-Eared Frogs (*Odorrana Tormota*). *Gene* **2018**, *678*, 241–251, doi:10.1016/j.gene.2018.08.007.
16. Yoshida, N.; Kaito, C. Dataset for de Novo Transcriptome Assembly of the African Bullfrog *Pyxicephalus Adspersus*. *Data in Brief* **2020**, *30*, 105388, doi:10.1016/j.dib.2020.105388.
17. Bossuyt, F.; Schulte, L.M.; Maex, M.; Janssenswillen, S.; Novikova, P.Y.; Biju, S.D.; Van de Peer, Y.; Matthijs, S.; Roelants, K.; Martel, A.; et al. Multiple Independent Recruitment of Sodefrin Precursor-Like Factors in Anuran Sexually Dimorphic Glands. *Molecular Biology and Evolution* **2019**, *36*, 1921–1930, doi:10.1093/molbev/msz115.
18. Zhang, Y.; Li, Y.; Qin, Z.; Wang, H.; Li, J. A Screening Assay for Thyroid Hormone Signaling Disruption Based on Thyroid Hormone-Response Gene Expression Analysis in the Frog *Pelophylax Nigromaculatus*. *Journal of Environmental Sciences* **2015**, *34*, 143–154, doi:10.1016/j.jes.2015.01.028.



19. Helbing, C.C.; Hammond, S.A.; Jackman, S.H.; Houston, S.; Warren, R.L.; Cameron, C.E.; Birol, I. Antimicrobial Peptides from *Rana* [Lithobates] *Catesbeiana*: Gene Structure and Bioinformatic Identification of Novel Forms from Tadpoles. *Sci Rep* **2019**, *9*, 1529, doi:10.1038/s41598-018-38442-1.
20. Eskew, E.A.; Shock, B.C.; LaDouceur, E.E.B.; Keel, K.; Miller, M.R.; Foley, J.E.; Todd, B.D. Gene Expression Differs in Susceptible and Resistant Amphibians Exposed to *Batrachochytrium Dendrobatidis*. *R. Soc. open sci.* **2018**, *5*, 170910, doi:10.1098/rsos.170910.
21. Stuckert, A.M.M.; Chouteau, M.; McClure, M.; LaPolice, T.M.; Linderoth, T.; Nielsen, R.; Summers, K.; MacManes, M.D. *The Genomics of Mimicry: Gene Expression throughout Development Provides Insights into Convergent and Divergent Phenotypes in a Müllerian Mimicry System*; Evolutionary Biology, 2019;
22. Christenson, M.K.; Trease, A.J.; Potluri, L.-P.; Jezewski, A.J.; Davis, V.M.; Knight, L.A.; Kolok, A.S.; Davis, P.H. De Novo Assembly and Analysis of the Northern Leopard Frog *Rana Pipiens* Transcriptome. *J Genomics* **2014**, *2*, 141–149, doi:10.7150/jgen.9760.
23. Price, S.J.; Garner, T.W.J.; Balloux, F.; Ruis, C.; Paszkiewicz, K.H.; Moore, K.; Griffiths, A.G.F. A de Novo Assembly of the Common Frog (*Rana Temporaria*) Transcriptome and Comparison of Transcription Following Exposure to Ranavirus and *Batrachochytrium Dendrobatidis*. *PLoS ONE* **2015**, *10*, e0130500, doi:10.1371/journal.pone.0130500.
24. Furman, B.L.S.; Evans, B.J. Sequential Turnovers of Sex Chromosomes in African Clawed Frogs (*Xenopus*) Suggest Some Genomic Regions Are Good at Sex Determination. *G3 (Bethesda)* **2016**, *6*, 3625–3633, doi:10.1534/g3.116.033423.
25. Birol, I.; Behsaz, B.; Hammond, S.A.; Kucuk, E.; Veldhoen, N.; Helbing, C.C. De Novo Transcriptome Assemblies of *Rana* (Lithobates) *Catesbeiana* and *Xenopus Laevis* Tadpole Livers for Comparative Genomics without Reference Genomes. *PLoS One* **2015**, *10*, e0130720, doi:10.1371/journal.pone.0130720.
26. Barbosa-Morais, N.L.; Irimia, M.; Pan, Q.; Xiong, H.Y.; Gueroussov, S.; Lee, L.J.; Slobodeniuc, V.; Kutter, C.; Watt, S.; Colak, R.; et al. The Evolutionary Landscape of Alternative Splicing in Vertebrate Species. *Science* **2012**, *338*, 1587–1593, doi:10.1126/science.1230612.
27. Guo, R.; Chen, D.; Diao, Q.; Xiong, C.; Zheng, Y.; Hou, C. Transcriptomic Investigation of Immune Responses of the *Apis Cerana Cerana* Larval Gut Infected by *Ascospaera Apis*. *Journal of Invertebrate Pathology* **2019**, *166*, 107210, doi:10.1016/j.jip.2019.107210.
28. Arvidson, R.; Kaiser, M.; Lee, S.S.; Urenda, J.-P.; Dail, C.; Mohammed, H.; Nolan, C.; Pan, S.; Stajich, J.E.; Libersat, F.; et al. Parasitoid Jewel Wasp Mounts Multipronged Neurochemical Attack to Hijack a Host Brain. *Molecular & Cellular Proteomics* **2019**, *18*, 99–114, doi:10.1074/mcp.RA118.000908.
29. Yek, S.H.; Boomsma, J.J.; Schiøtt, M. Differential Gene Expression in *Acromyrmex* Leaf-Cutting Ants after Challenges with Two Fungal Pathogens. *Mol Ecol* **2013**, *22*, 2173–2187, doi:10.1111/mec.12255.
30. Yoon, K.A.; Kim, K.; Kim, W.-J.; Bang, W.Y.; Ahn, N.-H.; Bae, C.-H.; Yeo, J.-H.; Lee, S.H. Characterization of Venom Components and Their Phylogenetic Properties in Some Aculeate Bumblebees and Wasps. *Toxins* **2020**, *12*, 47, doi:10.3390/toxins12010047.
31. McNamara-Bordewick, N.K.; McKinstry, M.; Snow, J.W. Robust Transcriptional Response to Heat Shock Impacting Diverse Cellular Processes despite Lack of Heat Shock Factor in Microsporidia. *mSphere* **2019**, *4*, e00219-19, doi:10.1128/mSphere.00219-19.
32. Becchimanzi, A.; Avolio, M.; Bostan, H.; Colantuono, C.; Cozzolino, F.; Mancini, D.; Chiusano, M.L.; Pucci, P.; Caccia, S.; Pennacchio, F. Venomics of the Ectoparasitoid Wasp *Bracon Nigricans*. *BMC Genomics* **2020**, *21*, 34, doi:10.1186/s12864-019-6396-4.
33. de Bekker, C.; Ohm, R.A.; Loreto, R.G.; Sebastian, A.; Albert, I.; Merrow, M.; Brachmann, A.; Hughes, D.P. Gene Expression during Zombie Ant Biting Behavior Reflects the Complexity Underlying Fungal Parasitic Behavioral Manipulation. *BMC Genomics* **2015**, *16*, 620, doi:10.1186/s12864-015-1812-x.
34. von Wychetzk, K.; Lowack, H.; Heinze, J. Transcriptomic Response to Injury Sheds Light on the Physiological Costs of Reproduction in Ant Queens. *Mol Ecol* **2016**, *25*, 1972–1985, doi:10.1111/mec.13588.
35. Zhao, W.; Shi, M.; Ye, X.; Li, F.; Wang, X.; Chen, X. Comparative Transcriptome Analysis of Venom Glands from *Cotesia Vestalis* and *Diadromus Collaris*, Two Endoparasitoids of the Host *Plutella Xylostella*. *Sci Rep* **2017**, *7*, 1298, doi:10.1038/s41598-017-01383-2.
36. Coffman, K.A.; Harrell, T.C.; Burke, G.R. A Mutualistic Poxvirus Exhibits Convergent Evolution with Other Heritable Viruses in Parasitoid Wasps. *J Virol* **2020**, *94*, doi:10.1128/JVI.02059-19.
37. Burke, G.R.; Strand, M.R. Systematic Analysis of a Wasp Parasitism Arsenal. *Mol Ecol* **2014**, *23*, 890–901, doi:10.1111/mec.12648.
38. Robinson, S.D.; Mueller, A.; Clayton, D.; Starobova, H.; Hamilton, B.R.; Payne, R.J.; Vetter, I.; King, G.F.; Undheim, E.A.B. A Comprehensive Portrait of the Venom of the Giant Red Bull Ant, *Myrmecia Gulosa* ,

- Reveals a Hyperdiverse Hymenopteran Toxin Gene Family. *Sci. Adv.* **2018**, *4*, eaau4640, doi:10.1126/sciadv.aau4640.
39. Martinson, E.O.; Mrinalini; Kelkar, Y.D.; Chang, C.-H.; Werren, J.H. The Evolution of Venom by Co-Option of Single-Copy Genes. *Curr Biol* **2017**, *27*, 2007–2013.e8, doi:10.1016/j.cub.2017.05.032.
  40. Cook, N.; Boulton, R.A.; Green, J.; Trivedi, U.; Tauber, E.; Pannebakker, B.A.; Ritchie, M.G.; Shuker, D.M. Differential Gene Expression Is Not Required for Facultative Sex Allocation: A Transcriptome Analysis of Brain Tissue in the Parasitoid Wasp *Nasonia Vitripennis*. *R. Soc. open sci.* **2018**, *5*, 171718, doi:10.1098/rsos.171718.
  41. Sim, A.D.; Wheeler, D. The Venom Gland Transcriptome of the Parasitoid Wasp *Nasonia Vitripennis* Highlights the Importance of Novel Genes in Venom Function. *BMC Genomics* **2016**, *17*, 571, doi:10.1186/s12864-016-2924-7.
  42. Kazuma, K.; Masuko, K.; Konno, K.; Inagaki, H. Combined Venom Gland Transcriptomic and Venom Peptidomic Analysis of the Predatory Ant *Odontomachus Monticola*. *Toxins (Basel)* **2017**, *9*, E323, doi:10.3390/toxins9100323.
  43. Smith, C.R.; Helms Cahan, S.; Kemena, C.; Brady, S.G.; Yang, W.; Bornberg-Bauer, E.; Eriksson, T.; Gadau, J.; Helmkampf, M.; Gotzek, D.; et al. How Do Genomes Create Novel Phenotypes? Insights from the Loss of the Worker Caste in Ant Social Parasites. *Mol Biol Evol* **2015**, *32*, 2919–2931, doi:10.1093/molbev/msv165.
  44. Özbek, R.; Wielsch, N.; Vogel, H.; Lochnit, G.; Foerster, F.; Vilcinskas, A.; von Reumont, B.M. Proteo-Transcriptomic Characterization of the Venom from the Endoparasitoid Wasp *Pimpla Turionellae* with Aspects on Its Biology and Evolution. *Toxins* **2019**, *11*, 721, doi:10.3390/toxins11120721.
  45. Yang, L.; Yang, Y.; Liu, M.-M.; Yan, Z.-C.; Qiu, L.-M.; Fang, Q.; Wang, F.; Werren, J.H.; Ye, G.-Y. Identification and Comparative Analysis of Venom Proteins in a Pupal Ectoparasitoid, *Pachycrepoideus vindemmiae*. *Front Physiol* **2020**, *11*, 9, doi:10.3389/fphys.2020.00009.
  46. Bouzid, W.; Verdenaud, M.; Klopp, C.; Ducancel, F.; Noirot, C.; Vétillard, A. De Novo Sequencing and Transcriptome Analysis for *Tetramorium bicarinatum*: A Comprehensive Venom Gland Transcriptome Analysis from an Ant Species. *BMC Genomics* **2014**, *15*, 987, doi:10.1186/1471-2164-15-987.
  47. Negroni, M.A.; Foitzik, S.; Feldmeyer, B. Long-Lived Temnothorax Ant Queens Switch from Investment in Immunity to Antioxidant Production with Age. *Sci Rep* **2019**, *9*, 7270, doi:10.1038/s41598-019-43796-1.
  48. Chen, S.; Zhou, Y.; Chen, Y.; Gu, J. Fastp: An Ultra-Fast All-in-One FASTQ Preprocessor. *Bioinformatics* **2018**, *34*, i884–i890, doi:10.1093/bioinformatics/bty560.
  49. Nip, K.M.; Chiu, R.; Yang, C.; Chu, J.; Mohamadi, H.; Warren, R.L.; Birol, I. RNA-Bloom Enables Reference-Free and Reference-Guided Sequence Assembly for Single-Cell Transcriptomes. *Genome Res.* **2020**, *30*, 1191–1200, doi:10.1101/gr.260174.119.
  50. Patro, R.; Duggal, G.; Love, M.I.; Irizarry, R.A.; Kingsford, C. Salmon Provides Fast and Bias-Aware Quantification of Transcript Expression. *Nat Methods* **2017**, *14*, 417–419, doi:10.1038/nmeth.4197.
  51. Haas, B.J.; Papanicolaou, A.; Yassour, M.; Grabherr, M.; Blood, P.D.; Bowden, J.; Couger, M.B.; Eccles, D.; Li, B.; Lieber, M.; et al. De Novo Transcript Sequence Reconstruction from RNA-Seq Using the Trinity Platform for Reference Generation and Analysis. *Nat Protoc* **2013**, *8*, 1494–1512, doi:10.1038/nprot.2013.084.
  52. Johnson, L.S.; Eddy, S.R.; Portugaly, E. Hidden Markov Model Speed Heuristic and Iterative HMM Search Procedure. *BMC Bioinformatics* **2010**, *11*, 431, doi:10.1186/1471-2105-11-431.
  53. Fu, L.; Niu, B.; Zhu, Z.; Wu, S.; Li, W. CD-HIT: Accelerated for Clustering the next-Generation Sequencing Data. *Bioinformatics* **2012**, *28*, 3150–3152, doi:10.1093/bioinformatics/bts565.
  54. Duckert, P.; Brunak, S.; Blom, N. Prediction of Proprotein Convertase Cleavage Sites. *Protein Engineering, Design and Selection* **2004**, *17*, 107–112, doi:10.1093/protein/gzh013.
  55. Li, C.; Sutherland, D.; Hammond, S.A.; Yang, C.; Taho, F.; Bergman, L.; Houston, S.; Warren, R.L.; Wong, T.; Hoang, L.M.N.; et al. AMPlify: Attentive Deep Learning Model for Discovery of Novel Antimicrobial Peptides Effective against WHO Priority Pathogens. *BMC Genomics* **2022**, *23*, 77, doi:10.1186/s12864-022-08310-4.
  56. Hart, A.J.; Ginzburg, S.; Xu, M. (Sam); Fisher, C.R.; Rahmatpour, N.; Mitton, J.B.; Paul, R.; Wegrzyn, J.L. EnTAP: Bringing Faster and Smarter Functional Annotation to Non-model Eukaryotic Transcriptomes. *Mol Ecol Resour* **2020**, *20*, 591–604, doi:10.1111/1755-0998.13106.
  57. Slater, G.; Birney, E. Automated Generation of Heuristics for Biological Sequence Comparison. *BMC Bioinformatics* **2005**, *6*, 31, doi:10.1186/1471-2105-6-31.
  58. Adamczak, R.; Porollo, A.; Meller, J. Combining Prediction of Secondary Structure and Solvent Accessibility in Proteins. *Proteins* **2005**, *59*, 467–475, doi:10.1002/prot.20441.
